# Supplementary material for: Three new MnII–[MoIII(CN)7]4− molecular magnets constructed from chiral bidentate chelating ligands
Source: Royal Society of Chemistry journal article supplement (doi:10.1039/d3dt00610g), 2023-01-01
Supplement: d3dt00610g1.pdf [file d3dt00610g1.pdf]

## Supporting Information

# Three New $\text{Mn}^{\text{II}}\text{-}[\text{Mo}^{\text{III}}(\text{CN})_7]^{4-}$ Molecular Magnets Constructed from Chiral Bidentate Chelating Ligands

Fang-Xue Xu,<sup>a</sup> Ying-Lian Li,<sup>a</sup> Xiao-Qin Wei,<sup>a</sup> Dong Shao,<sup>a</sup> Le Shi,<sup>a</sup> Hai-Yan Wei <sup>\*b</sup>  
and Xin-Yi Wang <sup>\*a</sup>

<sup>a</sup>. State Key Laboratory of Coordination Chemistry, Collaborative Innovation Center of Advanced Microstructures, School of Chemistry and Chemical Engineering, Nanjing University, Nanjing, 210023, China. E-mail: wangxy66@nju.edu.cn.

<sup>b</sup>. Jiangsu Key Laboratory of Biofunctional Materials, School of Chemistry and Materials Science, Nanjing Normal University, Nanjing, 210023, China. E-mail: weihaiyan@nynu.edu.cn.

## Table of contents.

|                                                                                                                                                                                                                                                                   |   |
|-------------------------------------------------------------------------------------------------------------------------------------------------------------------------------------------------------------------------------------------------------------------|---|
| <b>Figure S1.</b> The counter cations and ligands used for the synthesis of compounds based on $[\text{Mo}^{\text{III}}(\text{CN})_7]^{4-}$ .<br>.....                                                                                                            | 4 |
| <b>Figure S2.</b> The simulated and measured PXRD patterns for compounds <b>1-SS</b> (a), <b>1-RR</b> (b), and <b>2</b> (c). ....                                                                                                                                 | 4 |
| <b>Figure S3.</b> Thermogravimetric analysis of compounds <b>1-SS</b> (a), <b>1-RR</b> (b), and <b>2</b> (c).....                                                                                                                                                 | 5 |
| <b>Figure S4.</b> The IR spectra for compounds <b>1-SS</b> (a), <b>1-RR</b> (b), and <b>2</b> (c).....                                                                                                                                                            | 5 |
| <b>Figure S5.</b> The mirror images of the 2D layers in <b>1-SS</b> (a) and <b>1-RR</b> (b). Solvent molecules and all the H atoms have been omitted for clarity. Orange, dark yellow, blue, gray, and red represent Mo, Mn, N, C, and O atoms, respectively..... | 6 |
| <b>Figure S6.</b> The mirror images of supramolecular networks in <b>1-SS</b> (a) and <b>1-RR</b> (b). Solvent molecules and all the H atoms have been omitted for clarity. ....                                                                                  | 6 |
| <b>Figure S7.</b> The disordered chiral carbons and the Fischer projections of C14, C15, C14A, and C15A in compound <b>2</b> .....                                                                                                                                | 7 |
| <b>Figure S8.</b> The local structures and $\text{CN}^-$ bridged neighbors of the $\text{Mo}^{\text{III}}$ and $\text{Mn}^{\text{II}}$ centers in compound <b>2</b> .                                                                                             | 7 |
| <b>Figure S9.</b> The field-dependent magnetization curves of compounds <b>1-SS</b> , <b>1-RR</b> , and <b>2</b> measured at 2 K.                                                                                                                                 | 8 |
| <b>Figure S10.</b> Temperature-dependent ac susceptibilities for compounds <b>1-SS</b> (a), <b>1-RR</b> (b), and <b>2</b> (c) collected under $H_{\text{ac}} = 2$ Oe and $H_{\text{dc}} = 0$ Oe. ....                                                             | 8 |
| <b>Figure S11.</b> The coordination environment of $[\text{Mo}^{\text{III}}(\text{CN})_7]^{4-}$ , Mn-N-C bond angles, and $\text{Mn}^{\text{II}}\text{-Mo}^{\text{III}}$ distances in compounds <b>1-SS</b> and <b>2</b> .....                                    | 9 |

|                                                                                                                                                                                                                  |    |
|------------------------------------------------------------------------------------------------------------------------------------------------------------------------------------------------------------------|----|
| <b>Table S1.</b> The Mn-N-C bond angles and the Mn-N bond lengths in compounds <b>1-SS</b> and <b>2</b> . (the ones in the blue fields denote the axial cyanide bridges) .....                                   | 9  |
| <b>Table S2.</b> Selected bond lengths [ $\text{\AA}$ ] and angles [ $^\circ$ ] for complexes <b>1-SS</b> , <b>1-RR</b> , and <b>2</b> . (the ones in the blue fields denote the axial cyanide bridges) .....    | 10 |
| <b>Table S3.</b> Continuous Shape Measures (CShMs) of compounds <b>1-SS</b> , <b>1-RR</b> , and <b>2</b> .....                                                                                                   | 12 |
| <b>Table S4.</b> Molecular formula, space groups, structures, $T_c$ and $H_c$ values for the structurally characterized compounds based on the $[\text{Mo}^{\text{III}}(\text{CN})_7]^{4-}$ building block. .... | 13 |

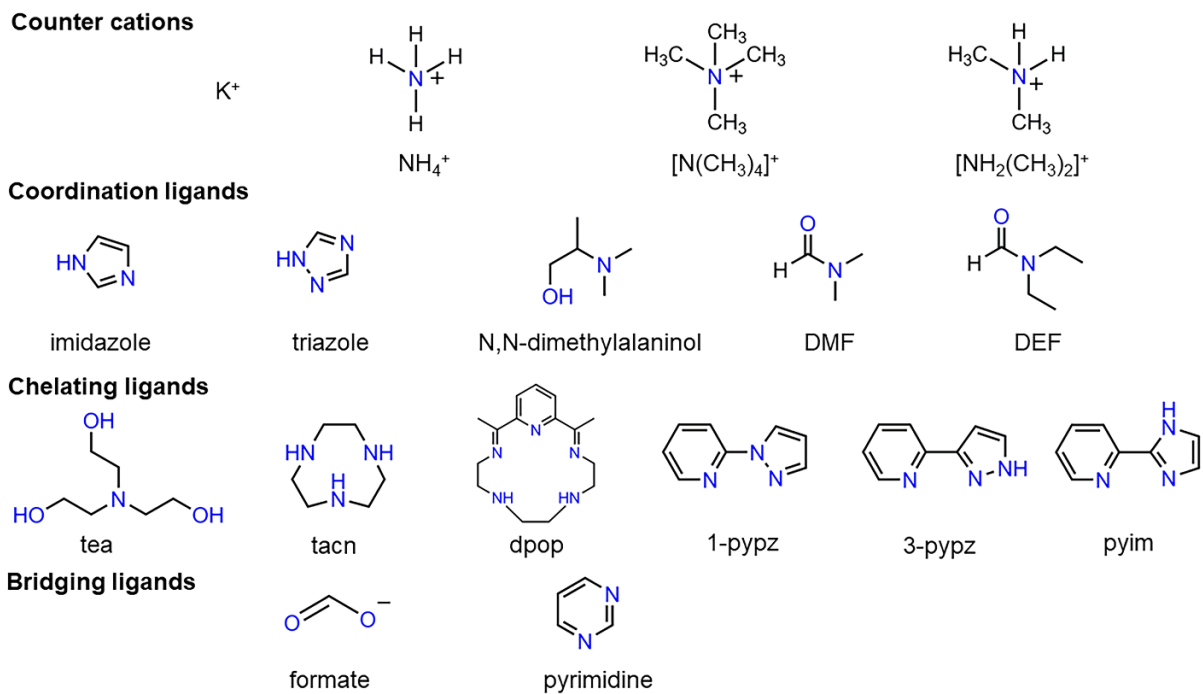

**Figure S1.** The counter cations and ligands used for the synthesis of compounds based on  $[Mo^{III}(CN)_7]^{4-}$ .

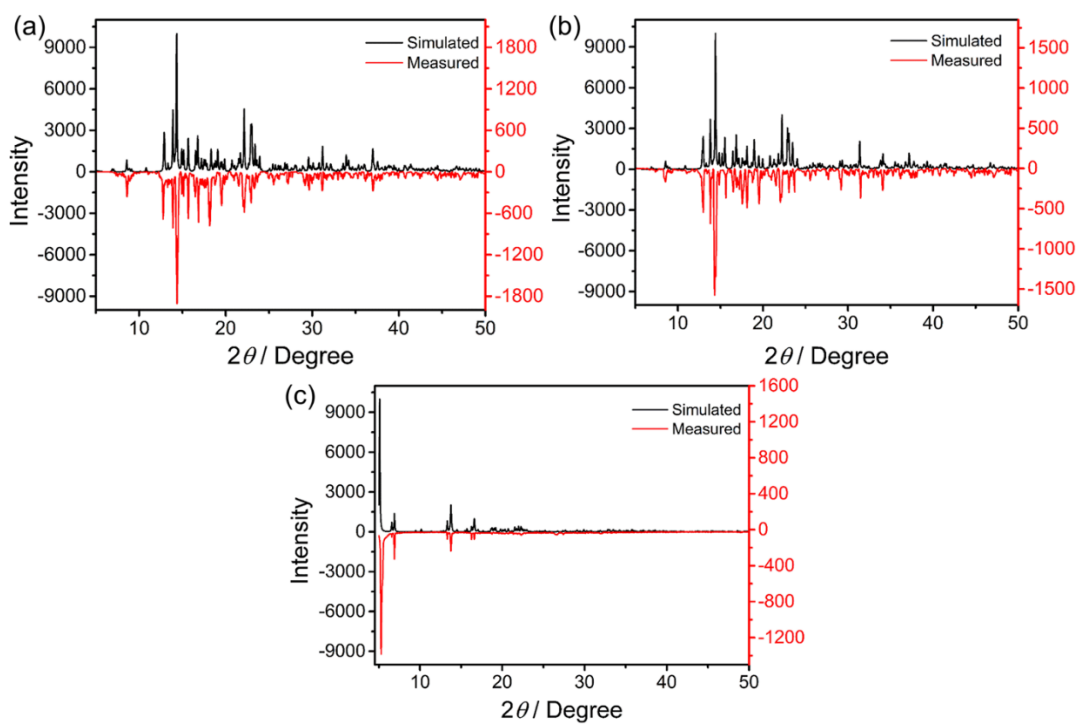

**Figure S2.** The simulated and measured PXRD patterns for compounds **1-SS** (a), **1-RR** (b), and **2** (c).

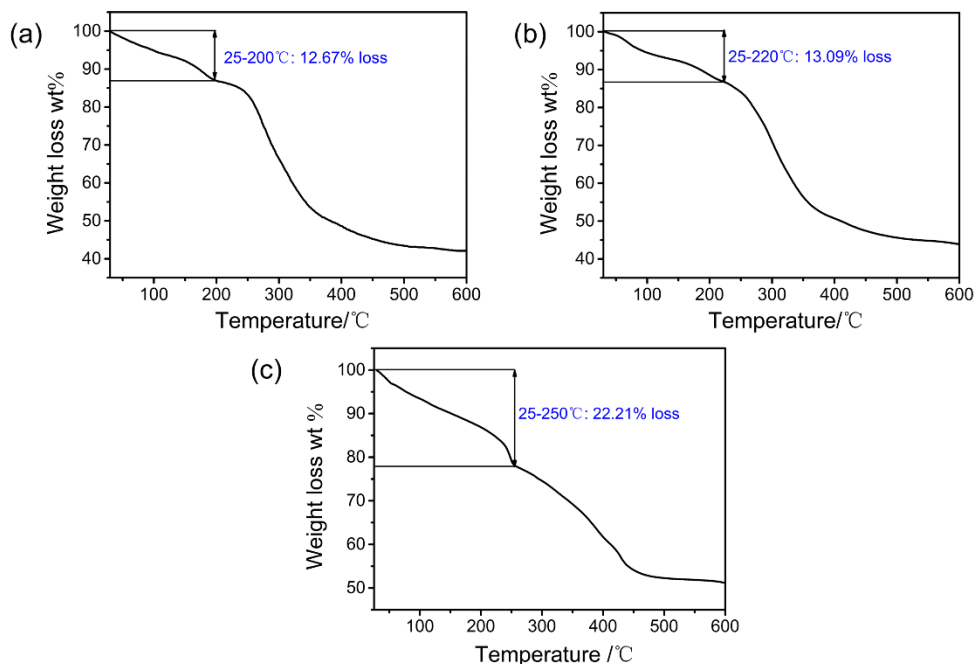

**Figure S3.** Thermogravimetric analysis of compounds **1-SS** (a), **1-RR** (b), and **2** (c). The weight losses of **1-SS**, **1-RR**, and **2** are 12.67%, 13.09%, and 22.21% below about 200 and 250 °C, consistent with the calculated values of 12.56% (4 H<sub>2</sub>O molecules and 4 MeCN molecules), 12.97% (4.5 H<sub>2</sub>O molecules and 4 MeCN molecules), and 22.39% (one H<sub>2</sub>O and 4 MeCN molecules) per asymmetric unit, respectively.

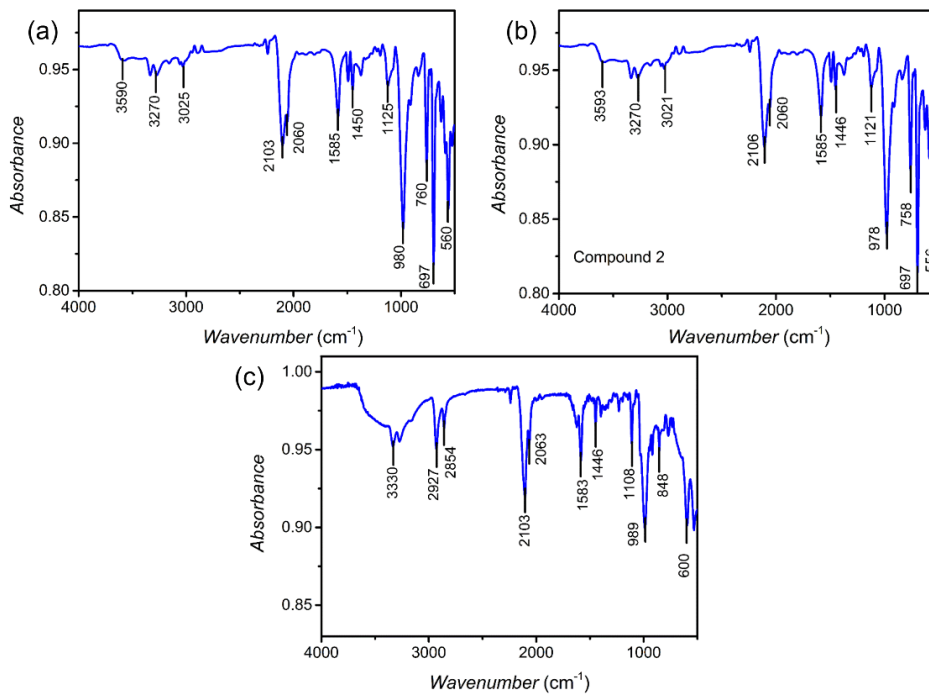

**Figure S4.** The IR spectra for compounds **1-SS** (a), **1-RR** (b), and **2** (c).

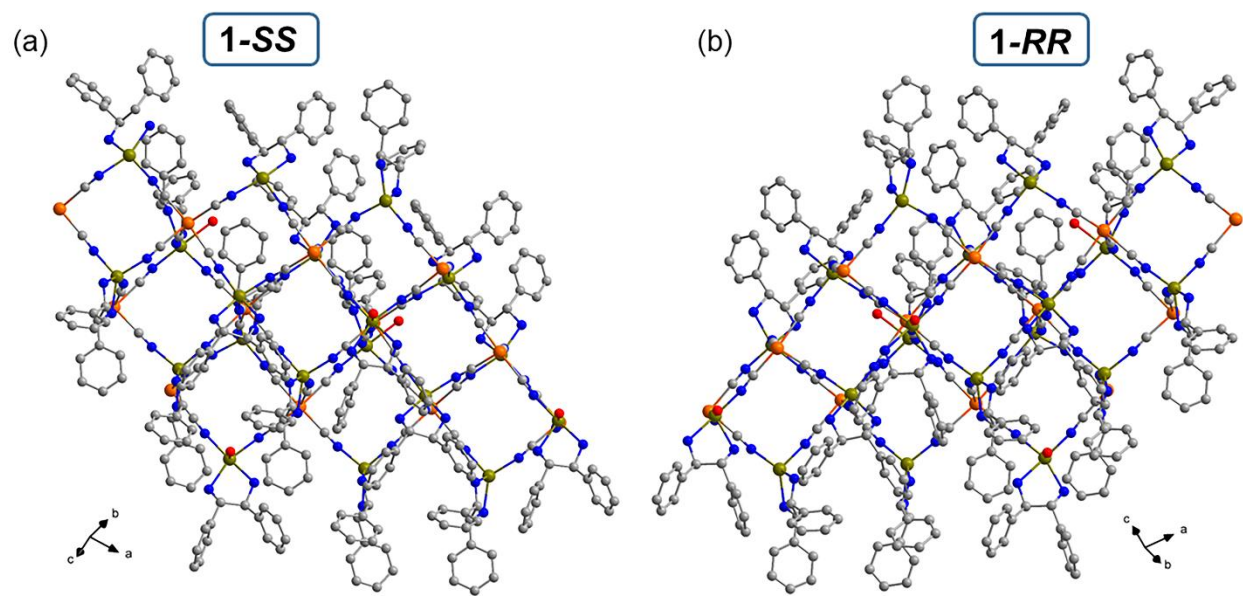

**Figure S5.** The mirror images of the 2D layers in **1-SS** (a) and **1-RR** (b). Solvent molecules and all the H atoms have been omitted for clarity. Orange, dark yellow, blue, gray, and red represent Mo, Mn, N, C, and O atoms, respectively.

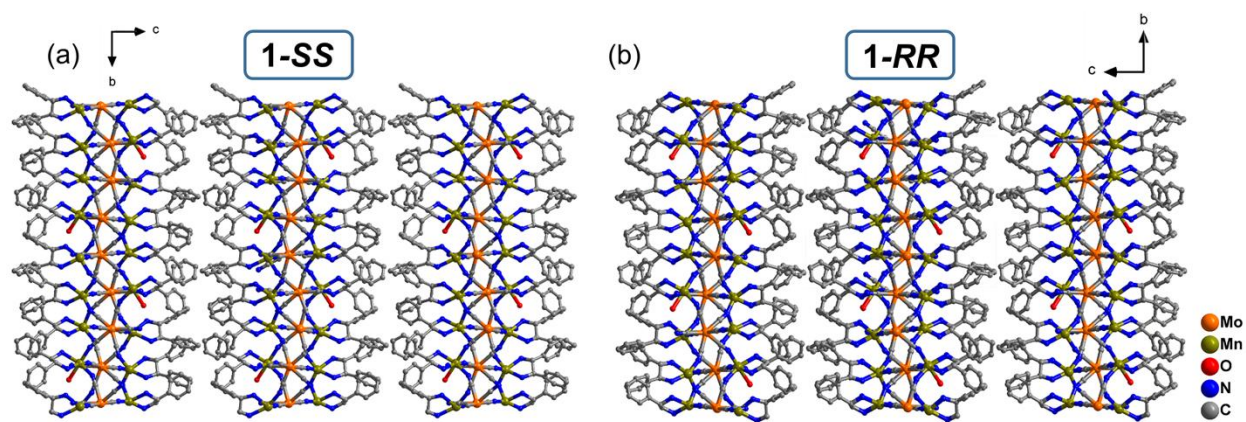

**Figure S6.** The mirror images of supramolecular networks in **1-SS** (a) and **1-RR** (b). Solvent molecules and all the H atoms have been omitted for clarity.

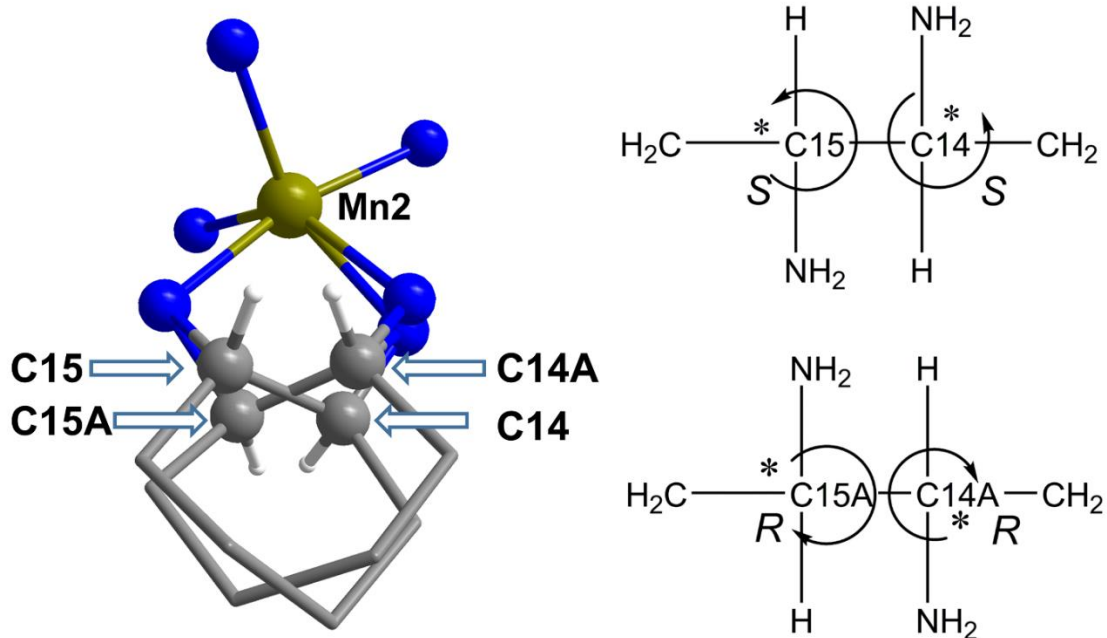

**Figure S7.** The disordered chiral carbons and the Fischer projections of C14, C15, C14A, and C15A in compound 2.

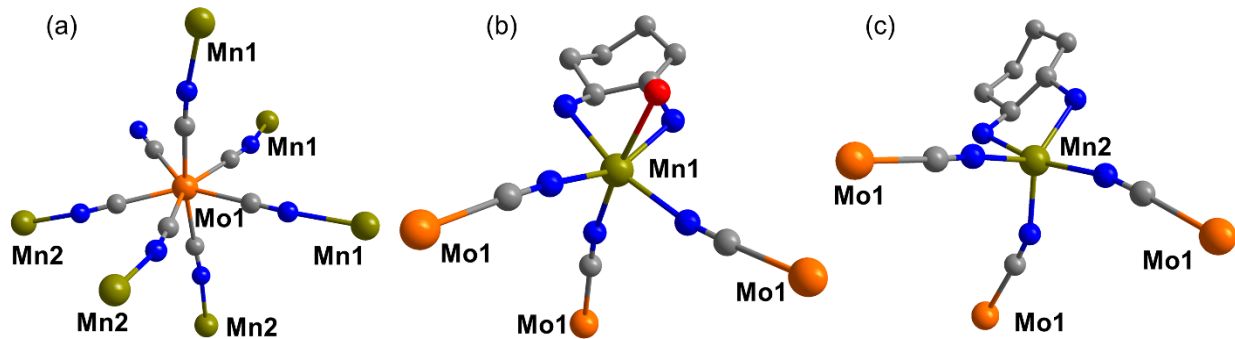

**Figure S8.** The local structures and CN<sup>-</sup> bridged neighbors of the Mo<sup>III</sup> and Mn<sup>II</sup> centers in compound 2.

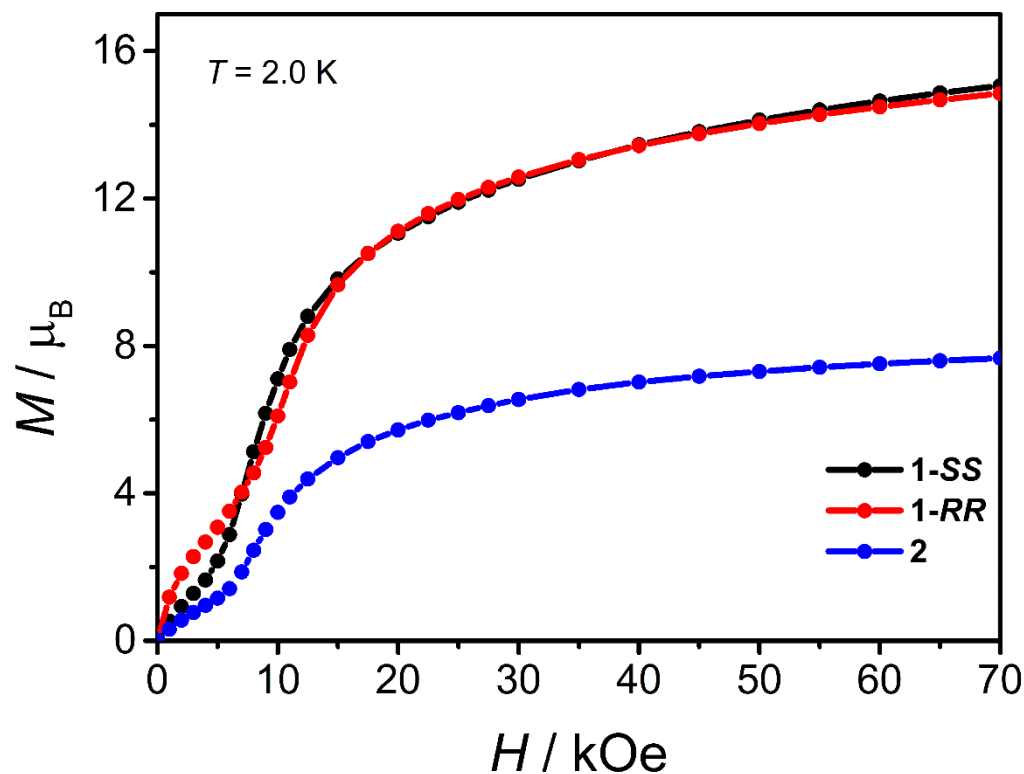

**Figure S9.** The field-dependent magnetization curves of compounds **1-SS**, **1-RR**, and **2** measured at 2 K.

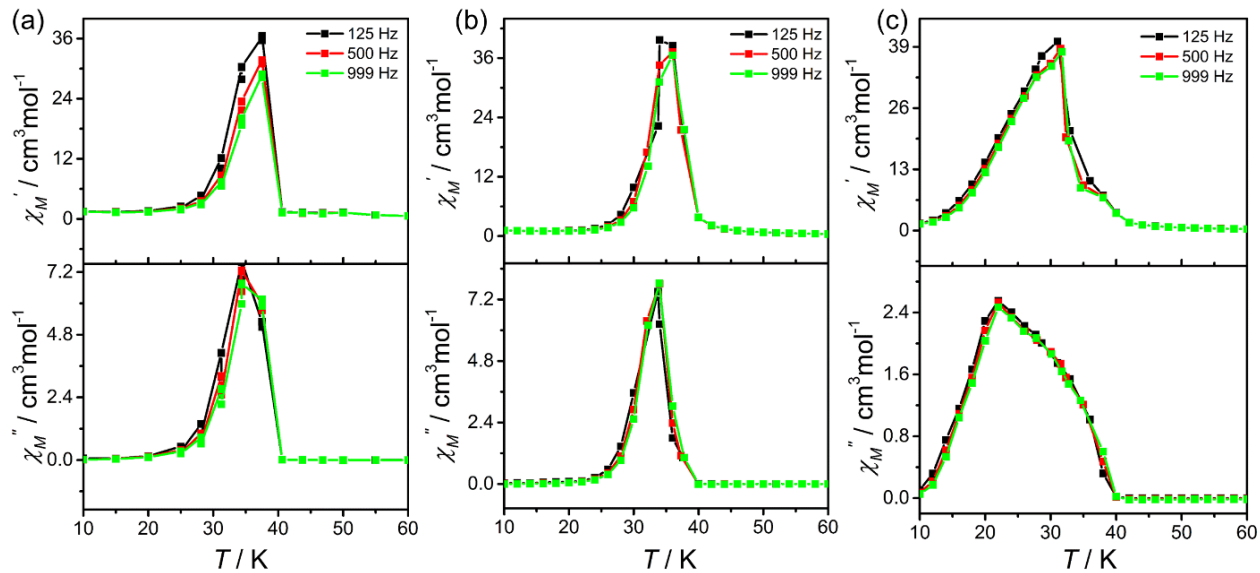

**Figure S10.** Temperature-dependent ac susceptibilities for compounds **1-SS** (a), **1-RR** (b), and **2** (c) collected under  $H_{ac} = 2$  Oe and  $H_{dc} = 0$  Oe.



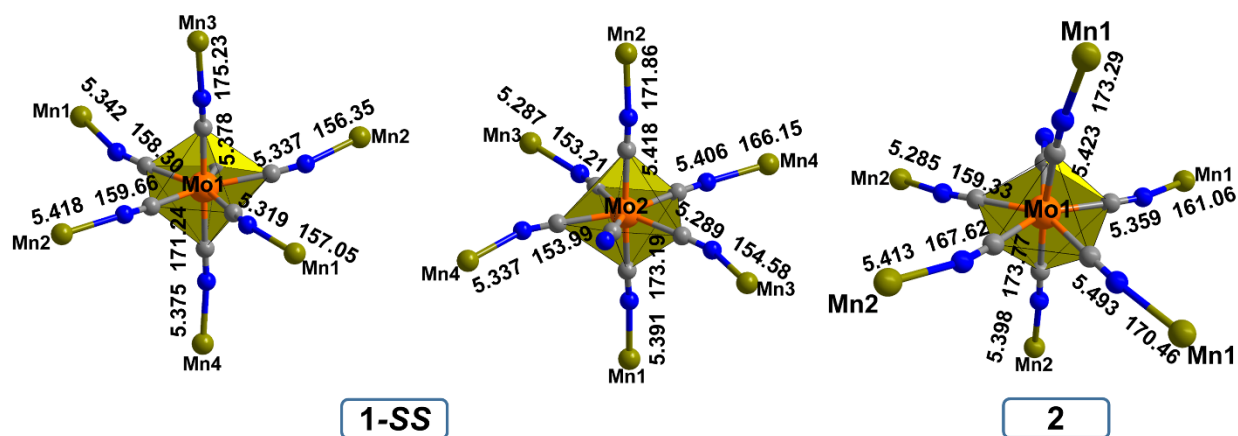

**Figure S11.** The coordination environment of  $[\text{Mo}^{\text{III}}(\text{CN})_7]^{4-}$ , Mn-N-C bond angles, and Mn<sup>II</sup>-Mo<sup>III</sup> distances in compounds **1-SS** and **2**.

**Table S1.** The Mn-N-C bond angles and the Mn-N bond lengths in compounds **1-SS** and **2**. (the ones in the blue fields denote the axial cyanide bridges)

| Mn-N-C angles [°]                                                                                                                                                 |          | Mn-N bond length [Å] |           |
|-------------------------------------------------------------------------------------------------------------------------------------------------------------------|----------|----------------------|-----------|
| <b>Complex 1-SS</b>                                                                                                                                               |          |                      |           |
| Mn3-N12-C12                                                                                                                                                       | 175.2(8) | Mn3-N12              | 2.075(8)  |
| Mn4-N13-C13                                                                                                                                                       | 171.2(8) | Mn4-N13              | 2.080(7)  |
| Mn1-N1-C1                                                                                                                                                         | 158.3(9) | Mn1-N1               | 2.149(9)  |
| Mn2-N2-C2                                                                                                                                                         | 156.4(8) | Mn2-N2               | 2.182(8)  |
| Mn1 <sup>3</sup> -N7-C7                                                                                                                                           | 157.0(9) | Mn1-N7 <sup>1</sup>  | 2.125(9)  |
| Mn2 <sup>1</sup> -N6-C6                                                                                                                                           | 159.7(9) | Mn2-N6 <sup>3</sup>  | 2.167(9)  |
| Mn1-N11-C11                                                                                                                                                       | 173.2(8) | Mn1-N11              | 2.118(8)  |
| Mn2 <sup>5</sup> -N14-C14                                                                                                                                         | 171.9(8) | Mn2-N14 <sup>2</sup> | 2.143(8)  |
| Mn3-N3-C3                                                                                                                                                         | 154.6(9) | Mn3-N3               | 2.166(9)  |
| Mn4 <sup>1</sup> -N4-C4                                                                                                                                           | 154.0(9) | Mn4-N4 <sup>3</sup>  | 2.200(9)  |
| Mn3 <sup>5</sup> -N8-C8                                                                                                                                           | 153.2(9) | Mn3-N8 <sup>2</sup>  | 2.105(10) |
| Mn4 <sup>6</sup> -N9-C9                                                                                                                                           | 166.2(8) | Mn4-N9 <sup>4</sup>  | 2.137(9)  |
| <sup>1</sup> 1-X,1/2+Y,1-Z; <sup>2</sup> 2-X,-1/2+Y,1-Z; <sup>3</sup> 1-X,-1/2+Y,1-Z; <sup>4</sup> -1+X,+Y,+Z; <sup>5</sup> 2-X,1/2+Y,1-Z; <sup>6</sup> 1+X,+Y,+Z |          |                      |           |
| <b>Complex 2</b>                                                                                                                                                  |          |                      |           |
| Mn1-N1-C1                                                                                                                                                         | 173.3(5) | Mn1-N1               | 2.144(4)  |
| Mn2-N6-C6                                                                                                                                                         | 173.8(5) | Mn2-N6               | 2.107(4)  |
| Mn1 <sup>4</sup> -N3-C3                                                                                                                                           | 170.5(4) | Mn1-N3 <sup>4</sup>  | 2.196(5)  |

|                         |          |                     |          |
|-------------------------|----------|---------------------|----------|
| Mn1 <sup>5</sup> -N4-C4 | 161.1(4) | Mn1-N4 <sup>3</sup> | 2.161(4) |
| Mn2-N2-C2               | 159.3(4) | Mn2-N2              | 2.111(4) |
| Mn2-N7-C7               | 167.6(4) | Mn2-N7              | 2.146(4) |

<sup>3</sup>-1+X,+Y,+Z; <sup>4</sup>1-X,1-Y,1-Z; <sup>5</sup>1+X,+Y,+Z

**Table S2.** Selected bond lengths [Å] and angles [°] for complexes **1-SS**, **1-RR**, and **2**. (the ones in the blue fields denote the axial cyanide bridges)

| Complex <b>1-SS</b>  |           |                           |           |
|----------------------|-----------|---------------------------|-----------|
| Bond lengths [Å]     |           | Bond angles [°]           |           |
| Mo1-C12              | 2.141(9)  | Mo1-C12-N12               | 175.4(7)  |
| Mo1-C13              | 2.152(9)  | Mo1-C13-N13               | 178.5(11) |
| Mo2-C11              | 2.143(8)  | Mo2-C11-N11               | 174.9(8)  |
| Mo2-C14              | 2.143(8)  | Mo2-C14-N14               | 176.8(9)  |
| Mo1-C1               | 2.156(12) | Mo1-C1-N1                 | 175.1(10) |
| Mo1-C2               | 2.175(11) | Mo1-C2-N2                 | 174.7(10) |
| Mo1-C5               | 2.142(8)  | Mo1-C5-N5                 | 174.5(11) |
| Mo1-C6               | 2.193(10) | Mo1-C6-N6                 | 175.4(9)  |
| Mo1-C7               | 2.169(11) | Mo1-C7-N7                 | 177.5(10) |
| Mo2-C3               | 2.131(10) | Mo2-C3-N3                 | 176.3(10) |
| Mo2-C4               | 2.161(11) | Mo2-C4-N4                 | 177.2(10) |
| Mo2-C8               | 2.145(10) | Mo2-C8-N8                 | 176.7(9)  |
| Mo2-C9               | 2.149(11) | Mo2-C9-N9                 | 176.3(9)  |
| Mo2-C10              | 2.164(10) | Mo2-C10-N10               | 177.5(12) |
| Complex <b>1-RR</b>  |           |                           |           |
| Bond lengths [Å]     |           | Bond angles [°]           |           |
| Mn3-N12 <sup>2</sup> | 2.100(9)  | Mn3 <sup>5</sup> -N12-C12 | 173.3(9)  |
| Mn4-N13              | 2.112(10) | Mn4-N13-C13               | 171.6(10) |
| Mn1-N11A             | 1.89(2)   | Mn1-N11A-C11A             | 165(4)    |
| Mn1-N11B             | 2.167(11) | Mn1-N11B-C11B             | 173.6(13) |
| Mn2-N14A             | 2.42(3)   | Mn2-N14A-C14A             | 160(4)    |
| Mn2-N14B             | 2.054(11) | Mn2-N14B-C14B             | 173.5(13) |
| Mo1-C12              | 2.150(11) | Mo1-C12-N12               | 176.4(9)  |
| Mo1-C13              | 2.133(11) | Mo1-C13-N13               | 176.2(12) |
| Mo2-C11B             | 2.155(11) | Mo2-C11B-N11B             | 175.0(12) |
| Mo2A-C11A            | 2.155(17) | Mo2A-C11A-N11A            | 177(4)    |
| Mo2-C14B             | 2.162(12) | Mo2-C14B-N14B             | 175.6(18) |

|                      |           |                           |           |
|----------------------|-----------|---------------------------|-----------|
| Mo2A-C14A            | 2.163(19) | Mo2A-C14A-N14A            | 172(6)    |
| Mn1-N1 <sup>4</sup>  | 2.160(11) | Mn1 <sup>6</sup> -N1-C1   | 156.5(11) |
| Mn1-N7 <sup>3</sup>  | 2.089(10) | Mn1 <sup>1</sup> -N7-C7   | 158.2(12) |
| Mn2-N2 <sup>2</sup>  | 2.190(10) | Mn2 <sup>5</sup> -N2-C2   | 154.4(11) |
| Mn2-N6               | 2.183(12) | Mn2-N6-C6                 | 162.9(11) |
| Mn3-N3A <sup>3</sup> | 2.268(19) | Mn3 <sup>1</sup> -N3B-C3B | 154.4(13) |
| Mn3-N3B <sup>3</sup> | 2.129(11) | Mn3-N8A-C8A               | 153(5)    |
| Mn3-N8A              | 1.84(3)   | Mn3-N8B-C8B               | 158.5(15) |
| Mn3-N8B              | 2.198(14) | Mn4 <sup>3</sup> -N4B-C4B | 148.6(17) |
| Mn4-N4A <sup>1</sup> | 2.36(2)   | Mn4-N9A-C9A               | 166(5)    |
| Mn4-N4B <sup>1</sup> | 2.163(12) | Mn4-N9B-C9B               | 163.7(14) |
| Mn4-N9A              | 1.78(2)   | Mo1-C1-N1                 | 178.2(13) |
| Mn4-N9B              | 2.252(12) | Mo1-C2-N2                 | 175.3(12) |
| Mo1-C1               | 2.112(12) | Mo1-C6-N6                 | 175.3(11) |
| Mo1-C2               | 2.129(12) | Mo1-C7-N7                 | 177.1(12) |
| Mo1-C6               | 2.159(13) | Mo1-C5-N5                 | 175.6(11) |
| Mo1-C7               | 2.172(12) | Mo2-C3B-N3B               | 176.3(15) |
| Mo1-C5               | 2.143(11) | Mo2A-C3A-N3A              | 170(5)    |
| Mo2-C3B              | 2.136(11) | Mo2-C4B-N4B               | 176.9(19) |
| Mo2A-C3A             | 2.158(18) | Mo2A-C4A-N4A              | 170(6)    |
| Mo2-C4B              | 2.133(12) | Mo2-C8B-N8B               | 177.8(15) |
| Mo2A-C4A             | 2.165(18) | Mo2A-C8A-N8A              | 176(5)    |
| Mo2-C8B              | 2.138(12) | Mo2-C9B-N9B               | 179.4(15) |
| Mo2A-C8A             | 2.149(18) | Mo2A-C9A-N9A              | 171(5)    |
| Mo2-C9B              | 2.155(11) | Mo2-C10B-N10B             | 175.7(18) |
| Mo2A-C9A             | 2.144(18) | Mo2A-C10A-N10A            | 169(5)    |
| Mo2-C10B             | 2.159(10) |                           |           |
| Mo2A-C10A            | 2.196(17) |                           |           |

<sup>1</sup>1-X,1/2+Y,1-Z; <sup>2</sup>2-X,-1/2+Y,1-Z; <sup>3</sup>1-X,-1/2+Y,1-Z; <sup>4</sup>-1+X,+Y,+Z; <sup>5</sup>2-X,1/2+Y,1-Z; <sup>6</sup>1+X,+Y,+Z

### Complex 2

| Bond lengths [Å]    |          | Bond angles [°]         |          |
|---------------------|----------|-------------------------|----------|
| Mo1-C1              | 2.142(5) | Mo1-C1-N1               | 176.5(5) |
| Mo1-C6 <sup>1</sup> | 2.157(5) | Mo1 <sup>1</sup> -C6-N6 | 177.4(5) |
| Mo1-C2              | 2.128(5) | Mo1-C2-N2               | 176.7(4) |
| Mo1-C3              | 2.174(5) | Mo1-C3-N3               | 179.0(4) |
| Mo1-C4              | 2.142(5) | Mo1-C4-N4               | 175.6(4) |
| Mo1-C5              | 2.132(6) | Mo1-C5-N5               | 178.4(7) |
| Mo1-C7 <sup>2</sup> | 2.158(5) | Mo1 <sup>2</sup> -C7-N7 | 177.0(4) |

**Table S3.** Continuous Shape Measures (CShMs) of compounds **1-SS**, **1-RR**, and **2**.

| Shape                                                | CShMs        |              |              |              |              |              |
|------------------------------------------------------|--------------|--------------|--------------|--------------|--------------|--------------|
|                                                      | <b>1-SS</b>  |              | <b>1-RR</b>  |              |              | <b>2</b>     |
|                                                      | Mo1          | Mo2          | Mo1          | Mo2          | Mo2A         | Mo1          |
| Heptagon ( $D_{7h}$ )                                | 33.365       | 33.126       | 32.930       | 33.024       | 31.294       | 33.409       |
| Hexagonal pyramid ( $C_{6v}$ )                       | 23.796       | 23.222       | 23.608       | 22.737       | 22.776       | 24.095       |
| <b>Pentagonal bipyramid (<math>D_{5h}</math>)</b>    | <b>0.785</b> | <b>0.964</b> | <b>0.884</b> | <b>1.808</b> | <b>5.458</b> | <b>0.840</b> |
| Capped octahedron ( $C_{3v}$ )                       | 4.486        | 4.056        | 4.313        | 2.775        | 6.716        | 4.723        |
| Capped trigonal prism ( $C_{2v}$ )                   | 3.565        | 3.281        | 3.152        | 2.450        | 5.920        | 3.014        |
| Johnson pentagonal bipyramid J13 ( $D_{5h}$ )        | 4.261        | 4.530        | 4.500        | 5.567        | 9.517        | 4.470        |
| Johnson elongated triangular pyramid J7 ( $C_{3v}$ ) | 21.790       | 21.069       | 21.700       | 30.635       | 17.405       | 22.573       |

| Shape                                                 | CShMs        |              |              |              |              |              |              |
|-------------------------------------------------------|--------------|--------------|--------------|--------------|--------------|--------------|--------------|
|                                                       | <b>1-SS</b>  |              |              | <b>1-RR</b>  |              |              | <b>2</b>     |
|                                                       | Mn1          | Mn3          | Mn4          | Mn1          | Mn3          | Mn4          | Mn2          |
| Pentagon ( $D_{5h}$ )                                 | 27.257       | 29.611       | 27.438       | 27.053       | 27.310       | 26.698       | 30.233       |
| Vacant octahedron ( $C_{4v}$ )                        | 5.217        | 2.163        | 4.679        | 5.393        | 2.590        | 5.676        | 5.218        |
| <b>Trigonal bipyramid (<math>D_{3h}</math>)</b>       | <b>2.551</b> | 3.872        | 2.987        | <b>2.853</b> | 6.187        | <b>3.241</b> | <b>1.495</b> |
| <b>Spherical square pyramid (<math>C_{4v}</math>)</b> | 3.086        | <b>1.035</b> | <b>2.889</b> | 3.298        | <b>1.093</b> | 4.511        | 3.892        |
| Johnson trigonal bipyramid J12 ( $D_{3h}$ )           | 5.130        | 6.122        | 5.449        | 5.322        | 9.006        | 6.029        | 3.966        |

| Shape                                      | CShMs        |              |              |
|--------------------------------------------|--------------|--------------|--------------|
|                                            | <b>1-SS</b>  | <b>1-RR</b>  | <b>2</b>     |
|                                            | Mn2          | Mn2          | Mn1          |
| Hexagon ( $D_{6h}$ )                       | 32.205       | 32.359       | 32.706       |
| Pentagonal pyramid ( $C_{5v}$ )            | 23.502       | 22.970       | 26.169       |
| <b>Octahedron (<math>O_h</math>)</b>       | <b>1.786</b> | <b>1.632</b> | <b>0.672</b> |
| Trigonal prism ( $D_{3h}$ )                | 11.384       | 12.215       | 14.056       |
| Johnson pentagonal pyramid J2 ( $C_{5v}$ ) | 27.191       | 26.508       | 30.114       |

**Table S4.** Molecular formula, space groups, structures,  $T_c$  and  $H_c$  values for the structurally characterized compounds based on the  $[\text{Mo}^{\text{III}}(\text{CN})_7]^{4-}$  building block.

| Compounds                                                                                                                                     | Space group              | Structure | $T_c/\text{K}$ | $H_c/\text{Oe}$         | Ref*. |
|-----------------------------------------------------------------------------------------------------------------------------------------------|--------------------------|-----------|----------------|-------------------------|-------|
| $\text{Mn}_2(\text{H}_2\text{O})_5\text{Mo}(\text{CN})_7 \cdot 4\text{H}_2\text{O}$<br>( $\alpha$ Phase)                                      | Monoclinic $P2_1/c$      | 3D        | 51             | -                       | 29a   |
| $\text{K}_2\text{Mn}_3(\text{H}_2\text{O})_6[\text{Mo}(\text{CN})_7]_2 \cdot 6\text{H}_2\text{O}$                                             | Monoclinic $C2$          | 2D        | 39             | 125 ( <sup>5</sup> K)   | 30a   |
| $\text{Mn}_2(\text{H}_2\text{O})_5\text{Mo}(\text{CN})_7 \cdot 4.75\text{H}_2\text{O}$<br>( $\beta$ Phase)                                    | Monoclinic $P2_1/c$      | 3D        | 51             | -                       | 29b   |
| $[\{\text{Mn}(\text{dpop})\}_6\{\text{Mo}^{\text{III}}(\text{CN})_7\}\{\text{Mo}^{\text{IV}}(\text{CN})_8\}_2] \cdot 19.5\text{H}_2\text{O}$  | Monoclinic $C2/c$        | 2D        | 3              | -                       | 37a   |
| $[\text{N}(\text{CH}_3)_4]_2[\text{Mn}(\text{H}_2\text{O})]_3$<br>$[\text{Mo}(\text{CN})_7]_2 \cdot 2\text{H}_2\text{O}$                      | Monoclinic $C2/c$        | 3D        | 86             | 200 ( <sup>1.8</sup> K) | 32    |
| $[\text{Mn}_2(\text{tea})\text{Mo}(\text{CN})_7] \cdot \text{H}_2\text{O}$                                                                    | Orthorhombic<br>$Pbca$   | 3D        | 75             | 70 ( <sup>5</sup> K)    | 35    |
| $[\text{Mn}_2(\text{tea})\text{Mo}(\text{CN})_7]$                                                                                             | Orthorhombic<br>$Pca2_1$ | 3D        | 106            | 200 ( <sup>5</sup> K)   | 35    |
| $[\text{NH}_4]_2\text{Mn}_3(\text{H}_2\text{O})_4[\text{Mo}(\text{CN})_7]_2$<br>$\cdot 4\text{H}_2\text{O}$                                   | Monoclinic $C2/c$        | 3D        | 53             | -                       | 31    |
| $[\{\text{Mn}(\text{HL})\}_2\text{Mn}\{\text{Mo}(\text{CN})_7\}_2]$<br>$\cdot 2\text{H}_2\text{O}$ (L = N,N-Dimethylalaninol)                 | Monoclinic $C2$          | 3D        | 85             | 150 ( <sup>2</sup> K)   | 34    |
| $\text{Mn}_2[\text{Mo}(\text{CN})_7] \cdot (\text{pyrimidine})_2 \cdot 2\text{H}_2\text{O}$                                                   | Monoclinic $P2_1/n$      | 3D        | 47             | 60 ( <sup>2</sup> K)    | 38    |
| $[\text{K}_2(\text{H}_2\text{O})_4\text{Mn}_5(\text{H}_2\text{O})_8(\text{MeCN})\{\text{Mo}(\text{CN})_7\}_3] \cdot 2\text{H}_2\text{O}$      | Monoclinic $P2_1/n$      | 3D        | 61             | 70 ( <sup>2</sup> K)    | 30b   |
| $\{\text{Mn}(\text{dpop})\}_3[\text{Mn}(\text{dpop})(\text{H}_2\text{O})]$<br>$[\text{Mo}(\text{CN})_7]_2 \cdot 13.5\text{H}_2\text{O}\}_n$   | Trigonal $R\bar{3}$      | 3D        | 2.6            | 90 ( <sup>1.8</sup> K)  | 37b   |
| $\{\text{Mn}(\text{dpop})\}_2[\text{Mo}(\text{CN})_7] \cdot 2\text{H}_2\text{O}\}_n$                                                          | Trigonal $R3$            | 3D        | 24             | 305 ( <sup>1.8</sup> K) | 37b   |
| $\{\text{Mn}(\text{dpop})\}_4\{(\text{dpop})\text{Mn}(\text{H}_2\text{O})\}_2$<br>$[\text{Mo}(\text{CN})_7]_3 \cdot 27\text{H}_2\text{O}\}_n$ | Monoclinic $P2_1/c$      | 2D        | 2.2            | 30 ( <sup>1.8</sup> K)  | 37c   |
| $[\text{Mn}(\text{L}_{\text{NSClO}})]_2[\text{Mo}(\text{CN})_7] \cdot 2\text{H}_2\text{O}$                                                    | Orthorhombic<br>$Pnma$   | 1D        | 5.6            | 1150 ( <sup>2</sup> K)  | 21    |
| $\{\text{Fe}_2(\text{H}_2\text{O})_5[\text{Mo}(\text{CN})_7] \cdot 5\text{H}_2\text{O}\}_n$                                                   | Monoclinic $P2_1$        | 3D        | 65             | 6000 ( <sup>2</sup> K)  | 22    |
| $\{[\text{NH}_2(\text{CH}_3)_2]_2\text{Fe}_5(\text{H}_2\text{O})_{10}$<br>$[\text{Mo}(\text{CN})_7]_3 \cdot 8\text{H}_2\text{O}\}_n$          | Orthorhombic<br>$Pnma$   | 3D        | 65             | 1900 ( <sup>2</sup> K)  | 22    |
| $\text{Mn}_2(3\text{-pypz})(\text{H}_2\text{O})(\text{CH}_3\text{CN})$<br>$[\text{Mo}(\text{CN})_7]$                                          | Monoclinic $C2/m$        | 3D        | 64             | 820 ( <sup>2</sup> K)   | 23    |
| $\text{Mn}_2(1\text{-pypz})(\text{H}_2\text{O})(\text{CH}_3\text{CN})$<br>$[\text{Mo}(\text{CN})_7]$                                          | Monoclinic $C2/m$        | 3D        | 66             | 72 ( <sup>2</sup> K)    | 23    |
| $\text{Mn}_2(\text{pyim})(\text{H}_2\text{O})(\text{CH}_3\text{CN})$                                                                          | Monoclinic $C2/m$        | 3D        | 62             | 146 ( <sup>2</sup> K)   | 23    |

|                                                                                                                                                                                 |                                              |    |     |                         |           |  |
|---------------------------------------------------------------------------------------------------------------------------------------------------------------------------------|----------------------------------------------|----|-----|-------------------------|-----------|--|
| [Mo(CN) <sub>7</sub> ]                                                                                                                                                          |                                              |    |     |                         |           |  |
| {(NH <sub>4</sub> ) <sub>3</sub> (H <sub>2</sub> O)Mn <sub>3</sub> (HCOO)}                                                                                                      | Orthorhombic                                 | 3D | 70  | 1500 <sup>(2 K)</sup>   | 25        |  |
| [Mo(CN) <sub>7</sub> ] <sub>2</sub> ·4H <sub>2</sub> O <sub>n</sub>                                                                                                             | <i>Pbam</i>                                  |    |     |                         |           |  |
| Mn <sub>2</sub> (DMF)(H <sub>2</sub> O) <sub>2</sub> [Mo(CN) <sub>7</sub> ]·H <sub>2</sub> O·CH <sub>3</sub> OH                                                                 | Triclinic <i>P</i> $\bar{1}$                 | 3D | 80  | 250 <sup>(2 K)</sup>    | 24        |  |
| Mn <sub>2</sub> (DEF)(H <sub>2</sub> O)[Mo(CN) <sub>7</sub> ]                                                                                                                   | Monoclinic <i>P2</i> <sub>1</sub> / <i>n</i> | 3D | 80  | 200 <sup>(2 K)</sup>    | 24        |  |
| {[Mn(imH) <sub>2</sub> ] <sub>2</sub> [Mn(H <sub>2</sub> O)(imH) <sub>3</sub> ]<br>[Mn(imH) <sub>4</sub> ][Mo(CN) <sub>7</sub> ] <sub>2</sub> ·6H <sub>2</sub> O <sub>n</sub> } | Monoclinic <i>C2/c</i>                       | 3D | 29  | 5000 <sup>(1.8 K)</sup> | 33        |  |
| {[Mn(H <sub>2</sub> O) <sub>2</sub> (imH) <sub>3</sub> [Mn(H <sub>2</sub> O)(imH) <sub>2</sub> ][Mo(CN) <sub>7</sub> ] <sub>2</sub> ·5H <sub>2</sub> O <sub>n</sub> }           | Triclinic <i>P</i> $\bar{1}$                 | 3D | 45  | 4500 <sup>(1.8 K)</sup> | 33        |  |
| {[Mn(Htrz)(H <sub>2</sub> O) <sub>2</sub> ][Mn(Htrz) <sub>0.7</sub> (H <sub>2</sub> O) <sub>2.3</sub> ][Mo(CN) <sub>7</sub> ]·5.6H <sub>2</sub> O <sub>n</sub> }                | Triclinic <i>P</i> $\bar{1}$                 | 3D | 45  | 710 <sup>(1.8 K)</sup>  | 33        |  |
| {[Mn(H <sub>2</sub> O) <sub>2</sub> ] <sub>3</sub> [Mn(H <sub>2</sub> O) <sub>4</sub> ]<br>[Mo(CN) <sub>7</sub> ] <sub>2</sub> ·6H <sub>2</sub> O·2urea <sub>n</sub> }          | Triclinic <i>P</i> $\bar{1}$                 | 3D | 59  | 110 <sup>(1.8 K)</sup>  | 33        |  |
| [Mn(bida)(H <sub>2</sub> O)] <sub>2</sub> [Mo(CN) <sub>7</sub> ]·6H <sub>2</sub> O                                                                                              | Triclinic <i>P</i> $\bar{1}$                 | 1D | 5.8 | 15000 <sup>(2 K)</sup>  | 20        |  |
| {[Mn(Dpen)] <sub>3</sub> [Mn(Dpen)(H <sub>2</sub> O)]<br>[Mo(CN) <sub>7</sub> ] <sub>2</sub> ·4.5H <sub>2</sub> O·4C <sub>2</sub> H <sub>3</sub> N <sub>n</sub> }               | Monoclinic <i>P2</i> <sub>1</sub>            | 2D | 40  | 8000 <sup>(2 K)</sup>   | This work |  |
| {[Mn(Chxn)][Mn(Chxn)(H <sub>2</sub> O)]<br>[Mo(CN) <sub>7</sub> ]·H <sub>2</sub> O·4C <sub>2</sub> H <sub>3</sub> N <sub>n</sub> }                                              | Triclinic <i>P</i> $\bar{1}$                 | 2D | 40  | 2000 <sup>(2 K)</sup>   | This work |  |

\*The reference numbers refer to the references in the main text.
